# Supplementary material
Source: publisher figshare collection journal article supplement (https://asha.figshare.com/articles/dataset/_/27078199)
Supplement: Supplementary file 1 [file 1]

# Flu-ID Aphasia Reference Sheet

## STEP 1: Transcribe 20-30 utterances from a monologic narrative task into Transcript sheet column B.

- Include errors, pauses, fillers, and empty or automatic/stereotypical utterances.
- Use syntactic and prosodic information (e.g., intonation, pausing) to segment utterances.
- Delete utterance-initial conjunctions, and utterance-initial and utterance-final *nonverbal* fillers and pauses.
- Split or spell out contractions, e.g., she's → **she 's** or **she is**; hafta → **haf ta** or **have to**.
- Transcribe real-word errors orthographically and non-word errors phonemically.
- Include a gloss after phonological errors with known targets, e.g., /gaTmXner/:godmother
- Time the sample and include the start and end time in minutes and seconds on the Transcript sheet.

## STEP 2: Add manual codes for the following spontaneous speech behaviors in Transcript sheet column C.

- Copy original utterances from Transcript sheet column B to Transcript sheet column C and add codes:

| Behavior                                                          | Definition                                                                                                           | Code | Examples                                                                                                   |
|-------------------------------------------------------------------|----------------------------------------------------------------------------------------------------------------------|------|------------------------------------------------------------------------------------------------------------|
| <b>Phonemic paraphasias</b>                                       | Phonemic error (substitution, addition, omission, misordering) with known target                                     | /*/  | wicked /stEtmxdr/:stepmother<br>glass /slikxrz/:slippers                                                   |
| <b>Abstruse neologisms</b>                                        | Phonological errors with unknown targets; may use !xxx! if phonemes are unclear                                      | !*   | a beautiful !bAsInxm!<br>she !xxx! it                                                                      |
| <b>Pauses</b>                                                     | Within-utterance pauses > 1 second                                                                                   | #    | she put on the# shoe                                                                                       |
| <b>Verbal &amp; nonverbal fillers</b>                             | Filled pauses (e.g., um, uh, like, you know); self-cues, hedges, asides                                              | \*   | she put on the \like um\ shoe<br>\J-K-L-M\ mice helped her<br>prince was \you know\ handsome               |
| <b>Repairs</b>                                                    | Repetitions, retraces, and reformulations, at word and utterance levels                                              | <*>  | </sI- sInxrElx/ I mean> Cinderella<br>went to the <party or> ball                                          |
| <b>Non-meaningful but grammatically essential speech</b>          | Empty speech, stereotypies, perseverations, semantically unrelated errors, which serve a grammatical function        | [*]  | godmother waved her [thing]<br>the [whole idea] was able to [do that]                                      |
| <b>Non-meaningful and grammatically extraneous/unclear speech</b> | Empty speech, stereotypies, perseverations, unrelated errors/jargon, with extraneous or unclear grammatical function | (*)  | the mice made a dress (or whatever)<br>the [female took] (opened) with her<br>danced (and !xxx!) all night |
| <b>Effort</b>                                                     | Perceived effort arising from articulatory distortions, prosodic disruptions, or repeated false starts               | 1/0  | 1 = presence of effort<br>0 = absence of effort (from Transcript sheet column D)                           |

### Coding Tips:

- Leave no spaces between codes and corresponding word(s), e.g., the# shoe.
- Group together consecutive words/elements meeting criteria for a given code, e.g., She had to go /brY fwElv okat/:by twelve o'clock; <no but I mean> she \um uh\ <does r-> \uh\ runs <to> \uh\ out.
- Use overlapping codes when applicable, e.g., <she 's \um\ so she# and> she <lea-> leaves his place.

# Flu-ID Aphasia Reference Sheet

## STEP 3: Trim the utterances in Analysis sheet column D

- Your coded utterances will automatically transfer from Transcript sheet column C to Analysis sheet column B.
- Copy the range of utterances from column B and paste into column D. [**IMPORTANT: Paste values only.**]
- For the macro-enabled workbook, click *Click to Remove Coded Items* button at the top of column D.
- For the macro-disabled version, manually find and replace the following codes: #, \\*, <\*>, (\*), /\*/. Put the code (with wildcard symbol, if appropriate) in the *Find* field and leave the *Replace with* field empty.

## STEP 4: Code utterance grammaticality in Analysis sheet column Q

The following codes denote whether syntax is disrupted by omission, addition, substitution, or misordering.

| Code         | Definition of utterance type                                                                              | Examples                                                                                           |
|--------------|-----------------------------------------------------------------------------------------------------------|----------------------------------------------------------------------------------------------------|
| <b>Frag</b>  | Incomplete and abandoned by the speaker                                                                   | she went to \uh\<br>the fairy godmother was                                                        |
| <b>Gram</b>  | Complete and grammatically well formed                                                                    | she went to the ball<br>Cinderella danced                                                          |
| <b>Agram</b> | Agrammatic, characterized by omission of one or more obligatory elements (e.g., function words/morphemes) | Prince <b>fall</b> in love Cinderella<br>she <b>dance</b> all night                                |
| <b>Pgram</b> | Paragrammatic, characterized by substitution, addition, or misordering of elements                        | she <b>mades</b> her all beautiful<br>she was married <b>by</b> the prince                         |
| <b>Ag/Pg</b> | Both agrammatic and paragrammatic                                                                         | stepmother and stepsisters <b>was ugly woman</b><br>Cinderella and <b>prince is</b> going to marry |
| <b>UK</b>    | Grammatical structure unknown                                                                             | Cinderella <b>!xxx!</b><br>it is <b>!frAzbx!</b>                                                   |
| <b>NA</b>    | No narrative words (narrative utterance cell is blank)                                                    |                                                                                                    |

**TIP:** Use prosodic cues to distinguish between fragments and agrammatic utterances

**NOTE:** Agram and Pgram codes take precedence, i.e., if agrammatic or paragrammatic elements are evident in fragments, code the utterance as agrammatic/paragrammatic.

## STEP 5: View PwA's fluency profile in Summary sheet

- Values from Analysis sheet will automatically transfer to Summary sheet to generate rating scores for **12 Fluency Dimensions** (Speech Rate, MLU, MaxLU, Agrammatism, Paragrammatism, Pauses, Fillers, Repairs, Empty Speech, Phonological Errors, Abstruse Neologisms, and Articulatory Effort).
- Ratings are used to compute **4 Summary Scores**: Grammatical Competence (GC), Lexical Availability (LA), Articulatory Facility (AF), and Overall Fluency.
- An **automatically populated bar chart** at the bottom of the sheet can be used to visualize how spontaneous speech dimensions contribute to the PwA's overall fluency profile. These should help guide therapy.
