# Supplementary material
Source: publisher figshare collection journal article supplement (https://asha.figshare.com/articles/dataset/_/27078199)
Supplement: Supplementary file 2 [file 1]

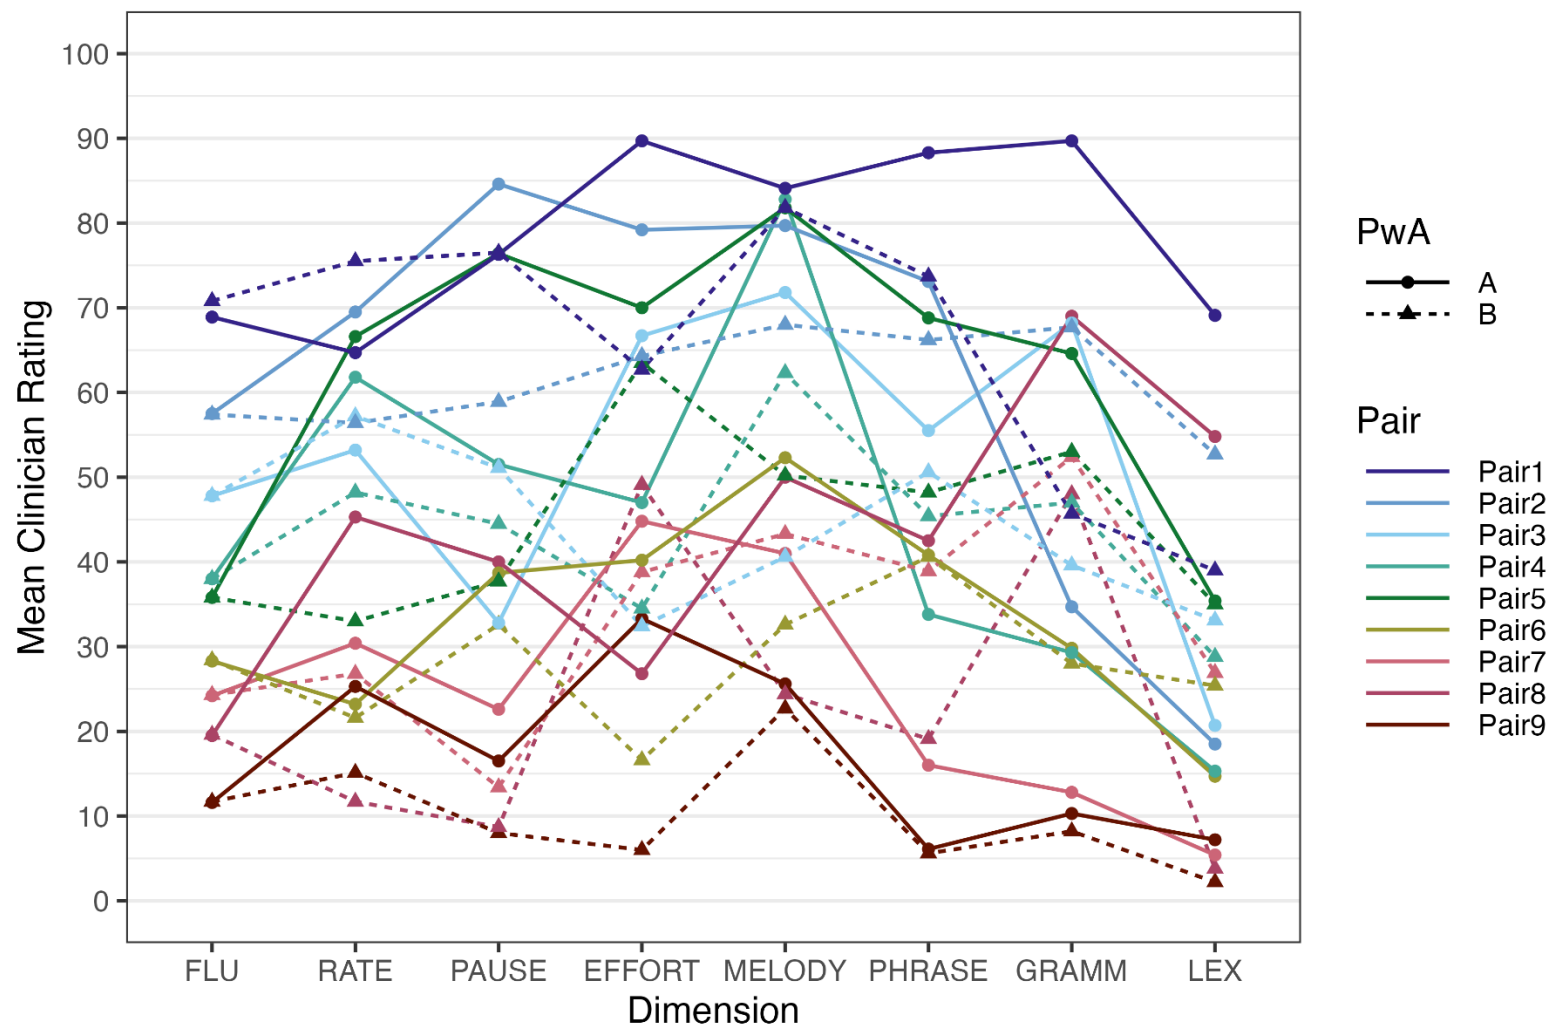

**Supplemental Material S5.** Clinical ratings from Gordon and Clough (2022) for 9 pairs of PwA used in the current study to develop the Flu-ID tool. Each pair had equivalent mean ratings of overall fluency, but discrepant mean ratings on different dimensions of fluency, and pairs were selected to cover the range of fluency, as rated by clinicians. All rating scales are oriented with higher scores indicating better or more fluent performance. [FLU = overall fluency; RATE = rate of speech; PAUSE = degree of pausing; EFFORT = effortful speech; MELODY = melodic or intonational contour; PHRASE = phrase length; GRAMM = grammatical competence; LEX = lexical retrieval. A (solid lines) and B (dotted lines) designate the two PwA in each pair.]
