# Supplementary material
Source: publisher figshare collection journal article supplement (https://asha.figshare.com/articles/dataset/_/27078199)
Supplement: Supplementary file 5 [file 1]

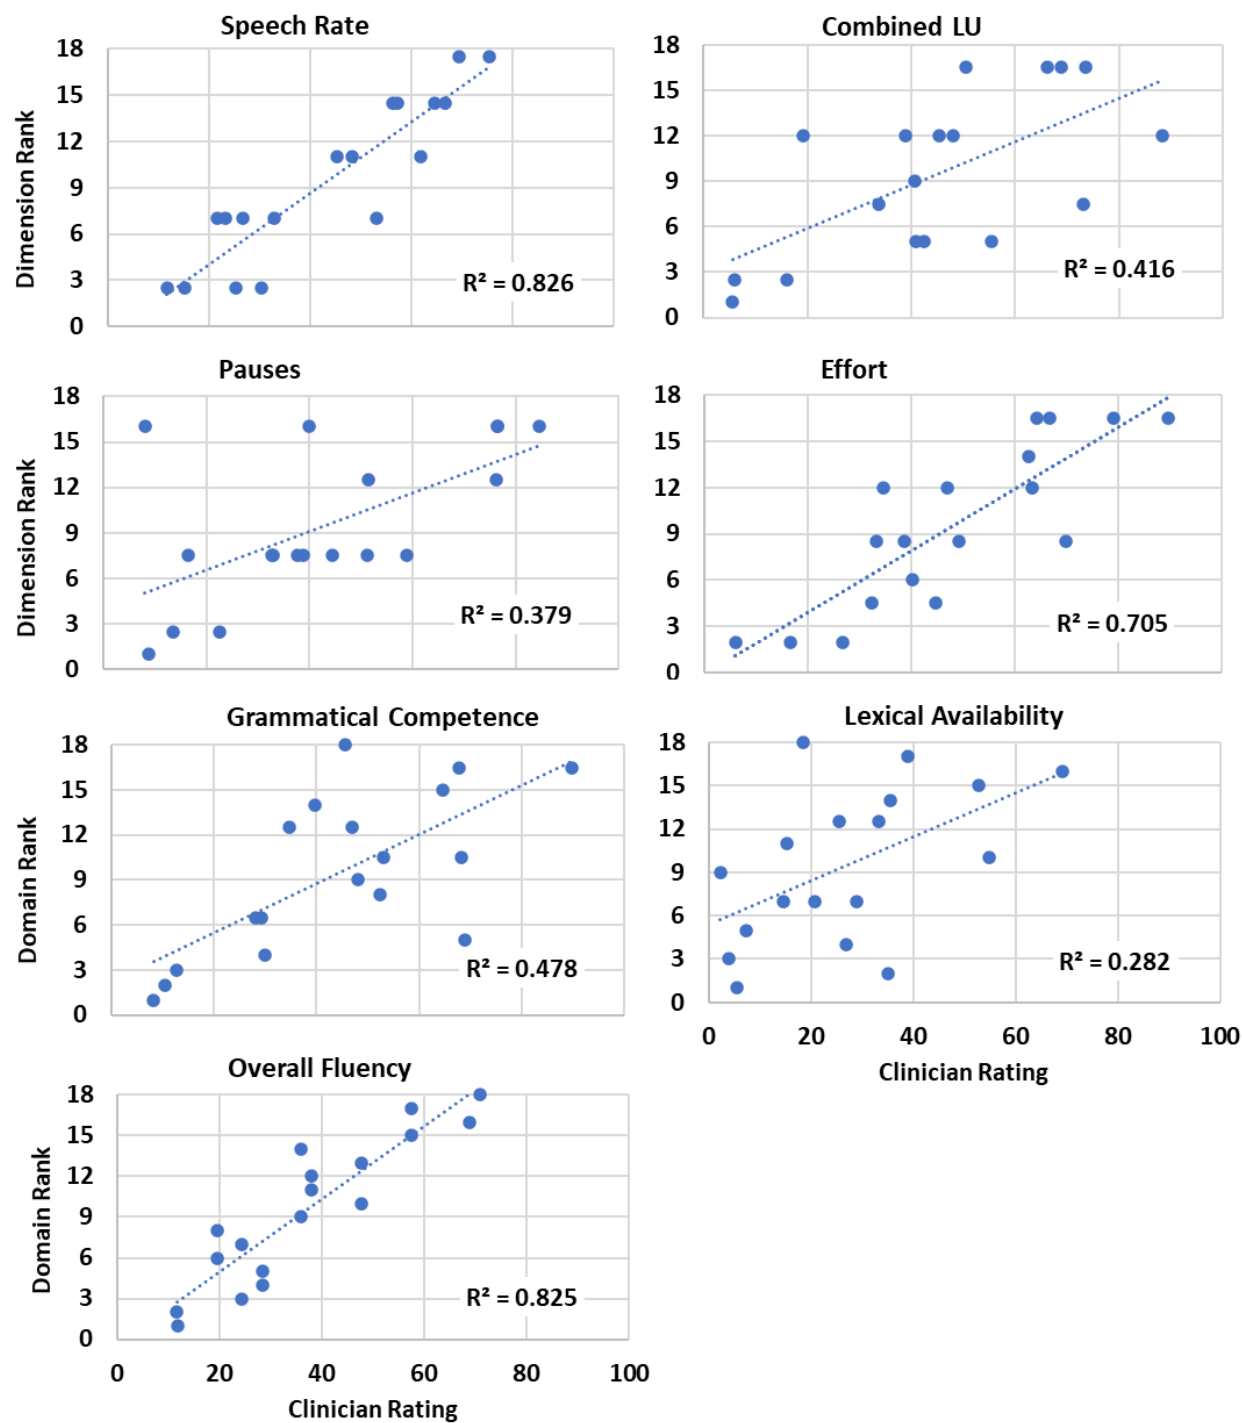

**Supplemental Material S7.** Relationships between clinician ratings (Gordon & Clough, 2022) and ranked dimension or domain scores from the current study
