# Supplementary material
Source: publisher figshare collection journal article supplement (https://asha.figshare.com/articles/dataset/_/27078199)
Supplement: Supplementary file 6 [file 1]

**Supplemental Material S6: Demographic and aphasia information from AphasiaBank for each of the PwA examined using the Flu-ID Aphasia**

| Pair | AphasiaBank Code | Age at Testing (years) | Gender | Education (years) | Occupation           | Aphasia Type        | WAB AQ | WAB Fluency Score | Aphasia Duration (years) | Dys | AoS | Fluency Rating |
|------|------------------|------------------------|--------|-------------------|----------------------|---------------------|--------|-------------------|--------------------------|-----|-----|----------------|
| 1    | tap10a           | 63.9                   | M      | 16                | nurse                | Anomic              | 67.8   | 8                 | 1.4                      | N   | N   | 70.8           |
| 1    | MSU01a           | 79.9                   | M      | 18                | social worker        | Anomic              | 89.6   | 9                 | 1.0                      | N   | N   | 68.9           |
| 2A   | kurland17a       | 55.1                   | F      | 12                | pre-school teacher   | Anomic              | 80.2   | 6                 | 0.6                      | N   | N   | 57.4           |
| 2B   | williamson23a    | 60.8                   | M      | 16                | computer security    | Wernicke            | 36.8   | 8                 | 2.7                      | N   | N   | 57.5           |
| 3    | BU02a            | 66.3                   | F      | 12                | home health care     | Transcortical Motor | 63.5   | 4                 | 1.2                      | N   | N   | 47.8           |
| 3    | kurland10a       | 78.0                   | F      | 12                | teacher              | Anomic              | 85.1   | 8                 | 0.5                      | N   | N   | 47.8           |
| 4    | ACWT09a          | 56.2                   | F      | 13                | restaurant manager   | Broca               | 80.1   | 8                 | 7.9                      | N   | Y   | 38.0           |
| 4    | elman12a         | 57.4                   | M      | 20                | optometry            | Wernicke            | 74.4   | 8                 | 3.5                      | N   | N   | 38.0           |
| 5    | kurland03a       | 81.4                   | F      | 18                | librarian            | Anomic              | 83.6   | 6                 | 6.5                      | N   | N   | 35.8           |
| 5    | whiteside02a     | 74.6                   | F      | 14                | project manager      | Conduction          | 60.7   | 6                 | 1.0                      | N   | N   | 35.8           |
| 6    | ACWT02a          | 53.1                   | F      | 14                | massage therapist    | Broca               | 74.6   | 4                 | 3.3                      | N   | Y   | 28.4           |
| 6    | adler18a         | 71.5                   | M      | 12                | truckdriver          | Transcortical Motor | 59.8   | 2                 | 5.8                      | Y   | Y   | 28.3           |
| 7    | BU03a            | 58.7                   | M      | 16                | finance              | Conduction          | 77.9   | 6                 | 1.5                      | N   | N   | 24.3           |
| 7    | whiteside09a     | 55.4                   | M      | 14                | administrator        | Broca               | 78.7   | 5                 | 5.1                      | N   | Y   | 24.2           |
| 8A   | kurland08a       | 67.5                   | F      | 14                | grants administrator | Anomic              | 92.2   | 8                 | 2.1                      | N   | N   | 19.6           |
| 8B   | adler01a         | 58.9                   | M      | 13                | iron worker          | Anomic              | 86.8   | 8                 | 1.3                      | Y   | Y   | 19.5           |
| 9    | tap16a           | 42.9                   | M      | 16                | police officer       | Broca               | 56.7   | 4                 | 0.9                      | Y   | Y   | 11.7           |
| 9    | cmu02b           | 42.9                   | M      | 16                | sales                | Broca               | 59.6   | 4                 | 11.7                     | Y   | N   | 11.6           |

*WAB-AQ = Western Aphasia Battery Aphasia Quotient, representing overall severity of aphasia; Dys = dysarthria; AoS = apraxia of speech.*
